# Supplementary material for: Role of tbc1 in Drosophila embryonic salivary glands
Source: PubMed Central journal article supplement (PMC6595604; doi:10.1186/s12860-019-0198-z), 2019-06-26

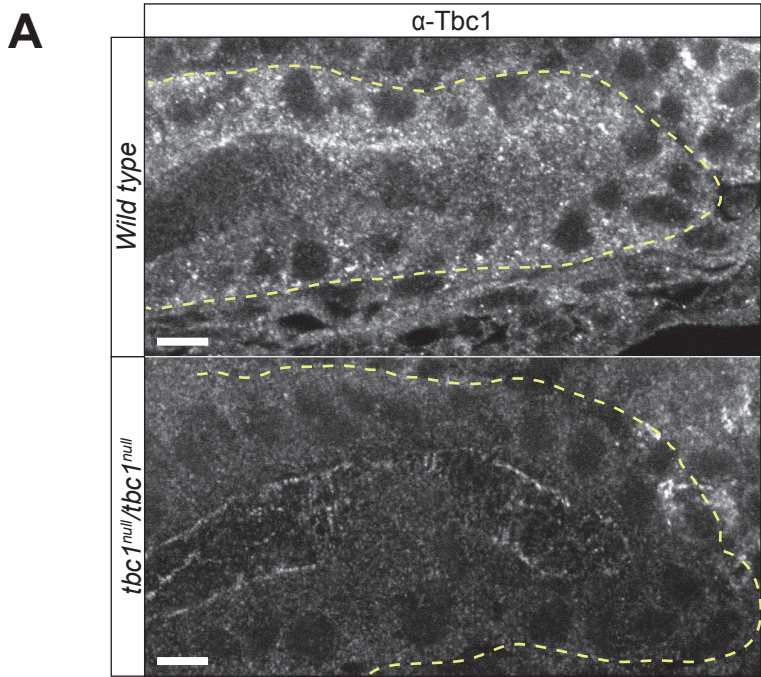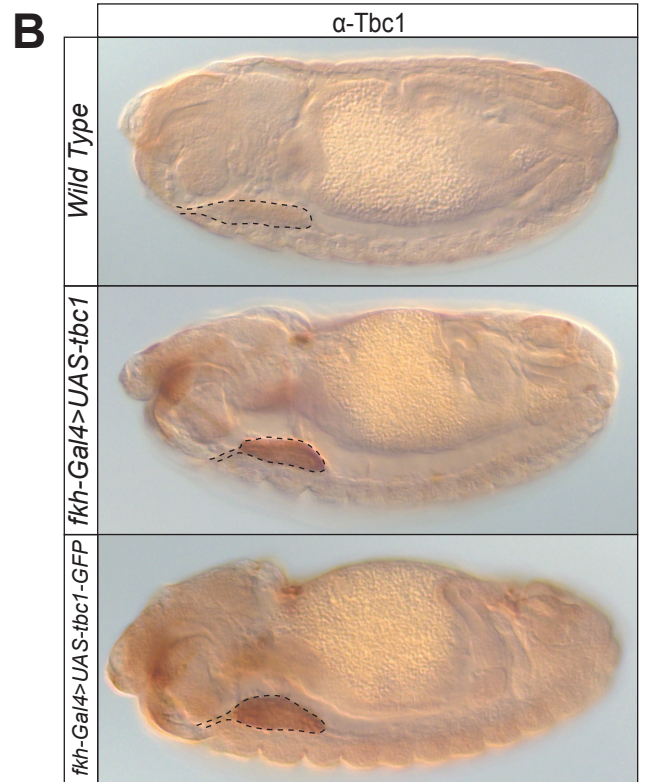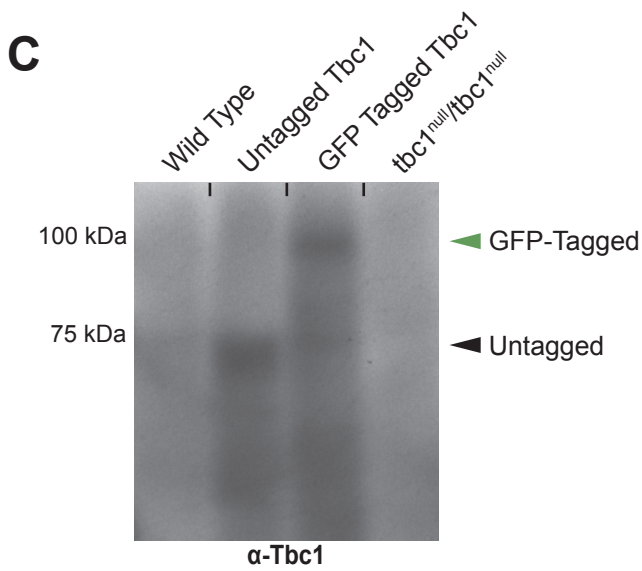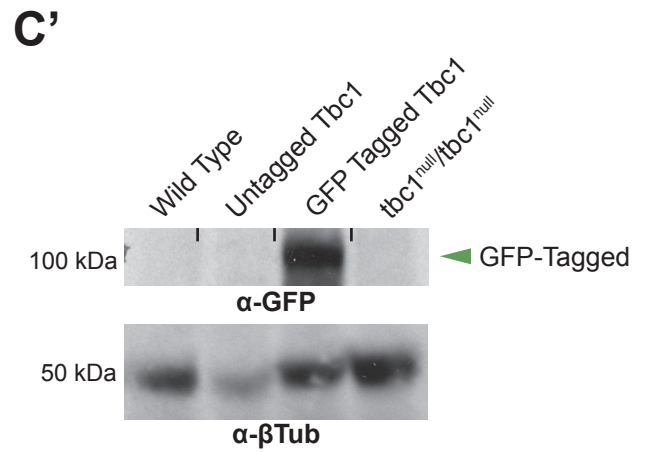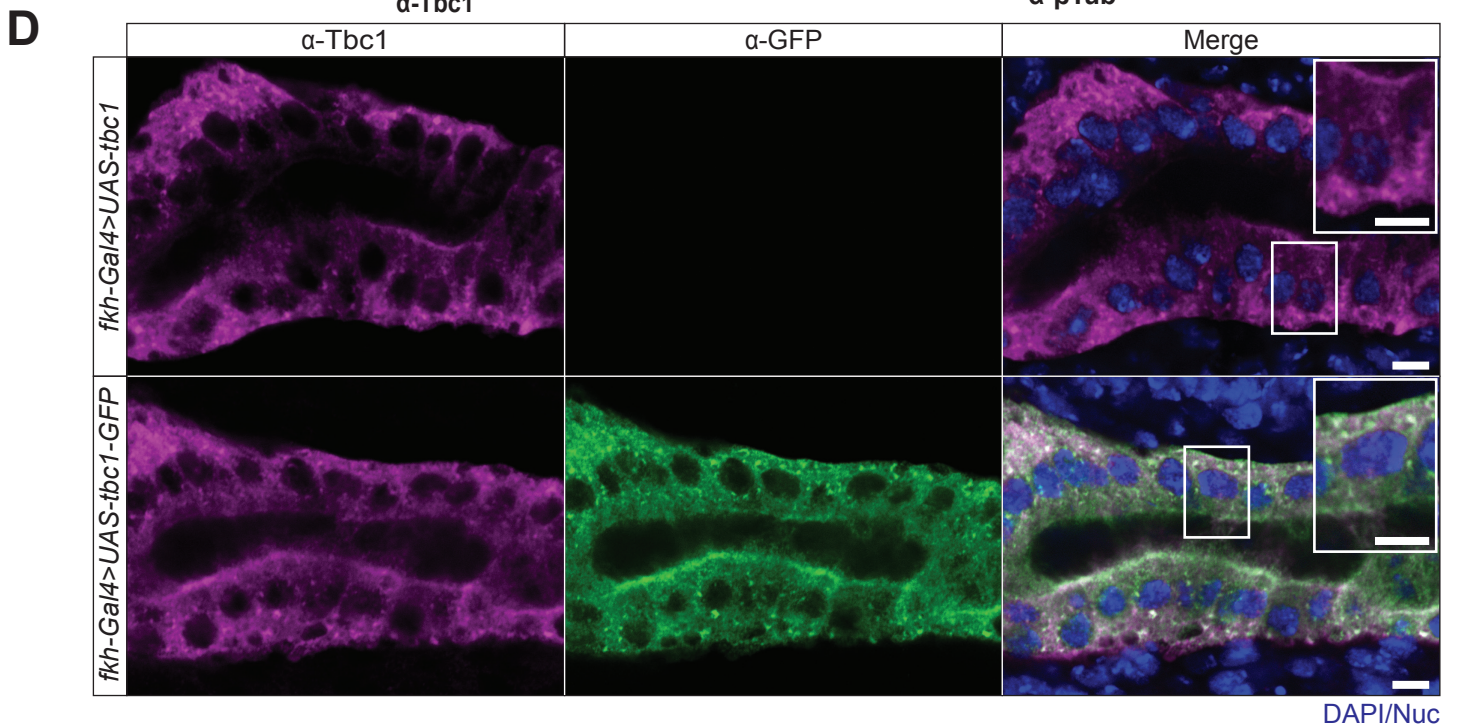

Supplement: 12860_2019_198_MOESM1_ESM.pdf [file 12860_2019_198_MOESM1_ESM.pdf]
