# Supplementary material for: Role of tbc1 in Drosophila embryonic salivary glands
Source: PubMed Central journal article supplement (PMC6595604; doi:10.1186/s12860-019-0198-z), 2019-06-26
Supplement: 12860_2019_198_MOESM5_ESM.pdf [file 12860_2019_198_MOESM5_ESM.pdf]

Percentage of developed individuals

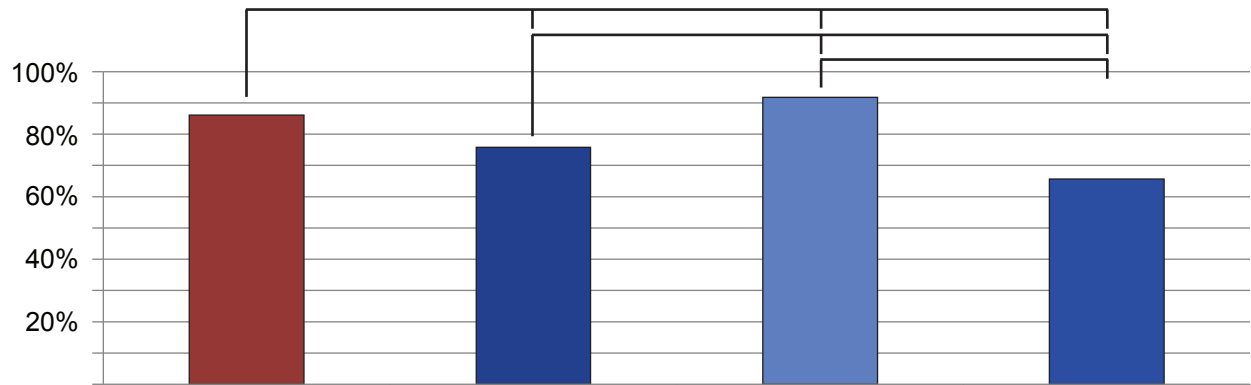

|                   |                  |                                   |                                   |                                   |
|-------------------|------------------|-----------------------------------|-----------------------------------|-----------------------------------|
| Maternal Genotype | <i>Wild Type</i> | $\frac{tbc1^{null}}{tbc1^{null}}$ | <i>Wild Type</i>                  | $\frac{tbc1^{null}}{tbc1^{null}}$ |
| Paternal Genotype | <i>Wild Type</i> | $\frac{tbc1^{null}}{tbc1^{null}}$ | $\frac{tbc1^{null}}{tbc1^{null}}$ | <i>Wild Type</i>                  |
| n                 | 1944             | 1046                              | 183                               | 211                               |
